# Supplementary material for: Electrodeposition of PtNi bimetallic nanoparticles on three-dimensional graphene for highly efficient methanol oxidation
Source: Royal Society of Chemistry journal article supplement (doi:10.1039/c5ra13728d), 2015-01-01
Supplement: c5ra13728d1.pdf [file c5ra13728d1.pdf]

## Supplementary Information

for

### **Electrodeposition of PtNi bimetallic nanoparticles on three-dimensional graphene for highly efficient methanol oxidation**

*Ruiping Xiu, Feifei Zhang\*, Zonghua Wang\*, Min Yang, Jianfei Xia,*

*Rijun Gui and Yanzhi Xia*

*Laboratory of Fiber Materials and Modern Textile, The Growing Base for State Key Laboratory, College of Chemical Science and Engineering, Shandong Sino-Japanese Center for Collaborative Research of Carbon Nanomaterials, Collaborative Innovation Center for Marine Biomass Fiber Materials and Textiles, Qingdao University, Qingdao, Shandong 266071, China*

*wangzonghua@qdu.edu.cn; zhangfeifei00921@163.com*

*Tel and Fax: + 86 0532 85950873*

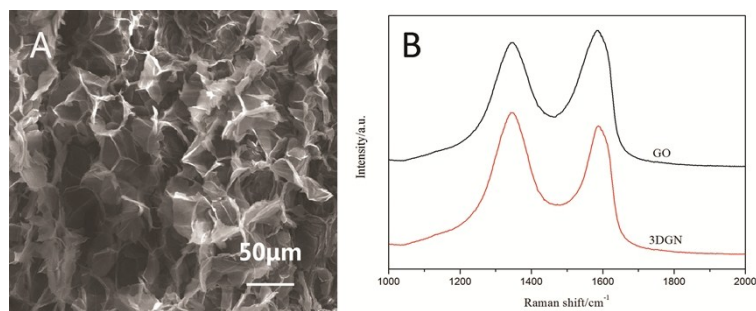

Fig. S1.(A) SEM image of 3DGN; (B) Raman spectra of GO (black line) and 3DGN (red line)

Fig. S1(A) shown the SEM image of 3DGN. The honeycomb structure, a typical morphology of 3DGN, can be found easily which proved that the 3DGN was actually synthesized. Also, the Raman spectra of graphene oxide (GO) and 3DGN were provided in Fig. S1(B). GO and 3DGN display two peaks around  $1345\text{ cm}^{-1}$  and  $1585\text{ cm}^{-1}$  corresponding to the D and G bands, respectively. The D band is related to structural defects in the curved graphene sheet or partially disordered structures of graphitic domains, while the G band corresponds to the graphitic hexagon-pinch pattern. The D/G intensity ratio increases from GO to 3DGN, which is due to the defects introduced into the 3DGN during reduction.

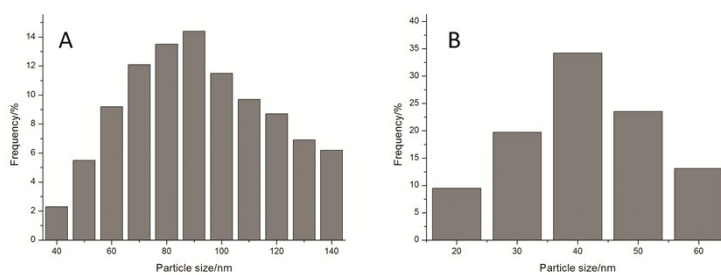

Fig. S2. Histograms of particle size distributions for Pt (A) and Pt/3DGN (B).

The average diameters of Pt nanoparticles deposited on GCE are  $\sim 90\text{ nm}$  (Fig. S2(A)), and on 3DGN are  $\sim 55\text{ nm}$ , (Fig. S2(B)).

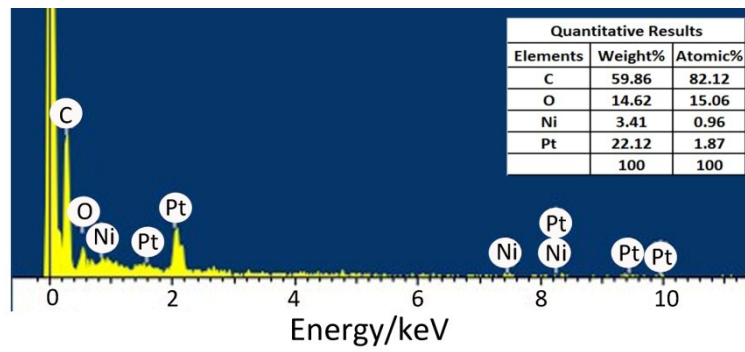

Fig. S3. The EDS spectra of PtNi/3DGN composite.

The composition of PtNi/3DGN composite was estimated by EDS (shown in Fig. S3), revealing the presence of C, O, Pt and Ni. Based on the EDS spectra, the atomic ratio of Pt/Ni is about 2:1.
